# Supplementary material for: The evolution of tumor metastasis during clonal expansion with alterations in metastasis driver genes
Source: PubMed Central journal article supplement (PMC4626809; doi:10.1038/srep15886), 2015-10-30
Supplement: srep15886-s1.pdf [file srep15886-s1.pdf]

1  
2  
3  
4  
5  
6  
7  
8  
9  
10  
11  
12  
13  
14

**SUPPLEMENTARY INFORMATION FOR**  
**The evolution of tumor metastasis during clonal expansion with alterations in**  
**metastasis driver genes**

Kimiyo N. Yamamoto<sup>1</sup>, Akira Nakamura<sup>2</sup>, and Hiroshi Haeno<sup>1\*</sup>

<sup>1</sup>Department of Biology, Faculty of Sciences, Kyushu University, Fukuoka 812-8581,  
Japan.

<sup>2</sup>Department of Radiation Oncology and Image-Applied Therapy, Kyoto University, Kyoto,  
Japan.

\*Author for correspondence. Email: haeno@kyushu-u.org (H.H.)

## SUPPLEMENTARY FIGURES

Figure S1 A

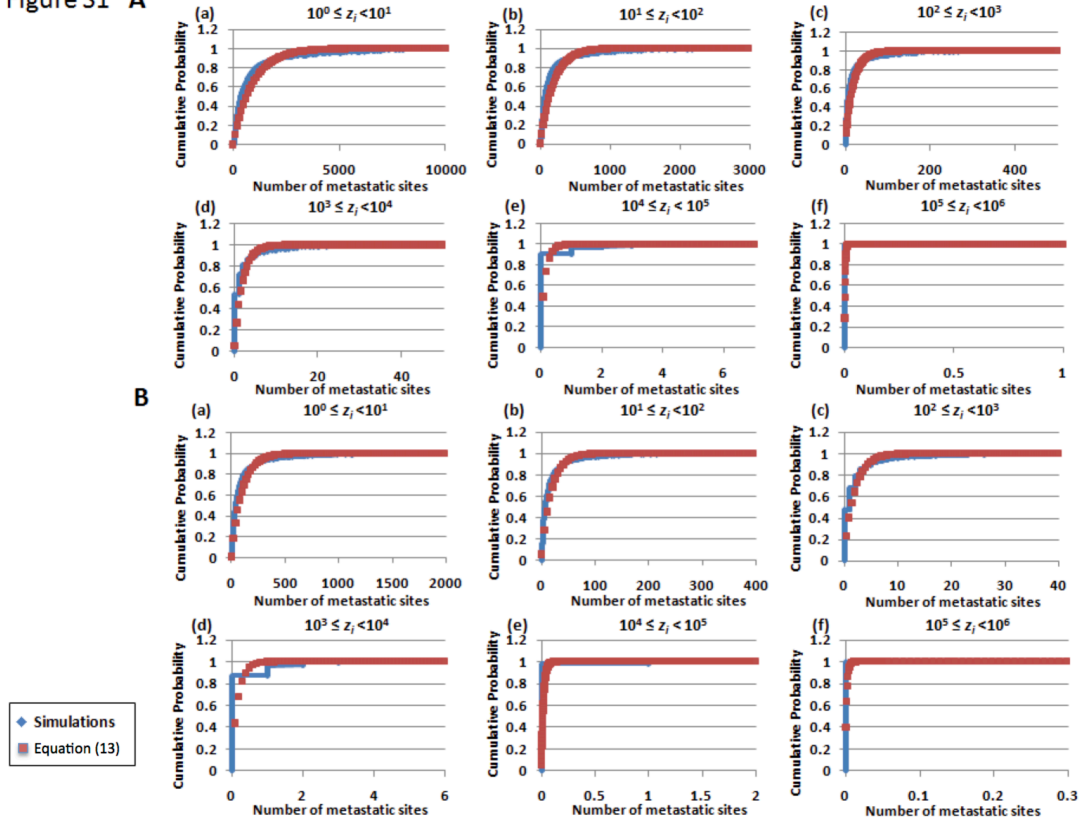

16

17 **Figure S1. Exponential distribution of the number of metastatic sites generated**  
 18 **from type-2 cells in different size categories.**

19

20

21

22

23

24

25

Blue lines denote the results of direct computational simulation and red lines denote a cumulative exponential distribution with the mean of the expected numbers of the categories. Parameter values are (A)  $r=1.0$ ,  $a_1=1.5$ ,  $a_2=2.0$ ,  $a_3=2.0$ ,  $u_1=u_2=0.001$ ,  $q=0.01$ , and  $M_I=10^7$ ; and (B)  $r=1.0$ ,  $a_1=1.5$ ,  $a_2=2.0$ ,  $a_3=2.0$ ,  $u_1=u_2=0.001$ ,  $q=0.001$ , and  $M=10^7$ .

Figure S2

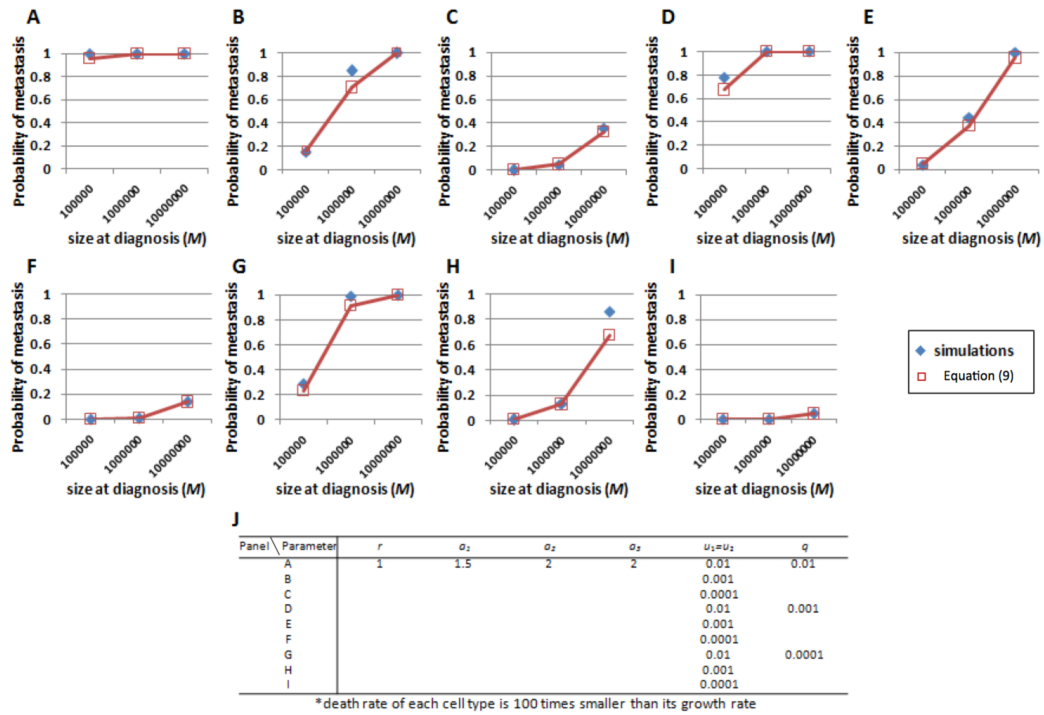

26

27 **Figure S2. Probability of metastasis generated from type-2 cells with various**  
 28 **(epi)genetic alterations and metastatic rates.**

29 The figures show the dependence of the probability of the existence of  
 30 metastatic cells (type-3 cells) upon diagnosis for various parameters. The blue dots  
 31 show the results of the direct computer simulations, while the red line shows the  
 32 predictions of the analytical approximations (Eq. (9)). Parameter values are listed in  
 33 panel J.

34

Figure S3

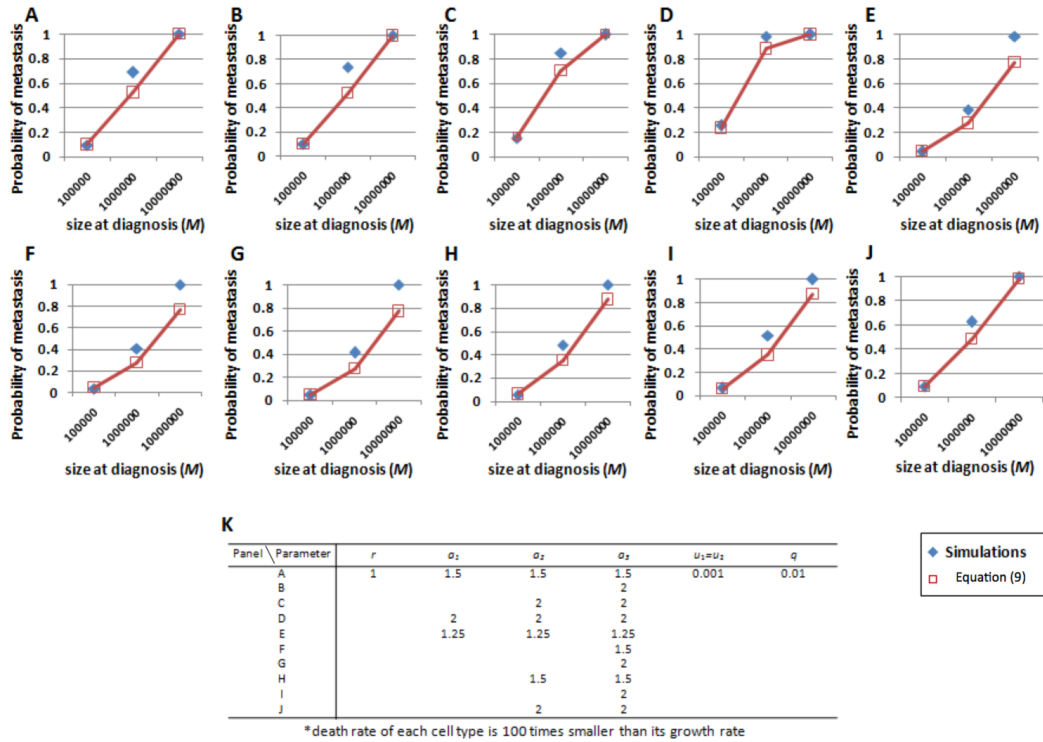

35

36 **Figure S3. Probability of metastasis generated from type-2 cells with various**  
 37 **growth rates for each cell type.**

38 The figures show the dependence of the probability of the existence of  
 39 metastatic cells (type-3 cells) upon diagnosis on the growth rate for each cell type. The  
 40 blue dots show the results of the direct computer simulations, while the red line shows  
 41 the predictions of the analytical approximations (Eq. (9)). Parameter values are listed in  
 42 panel K.

43



Figure S4

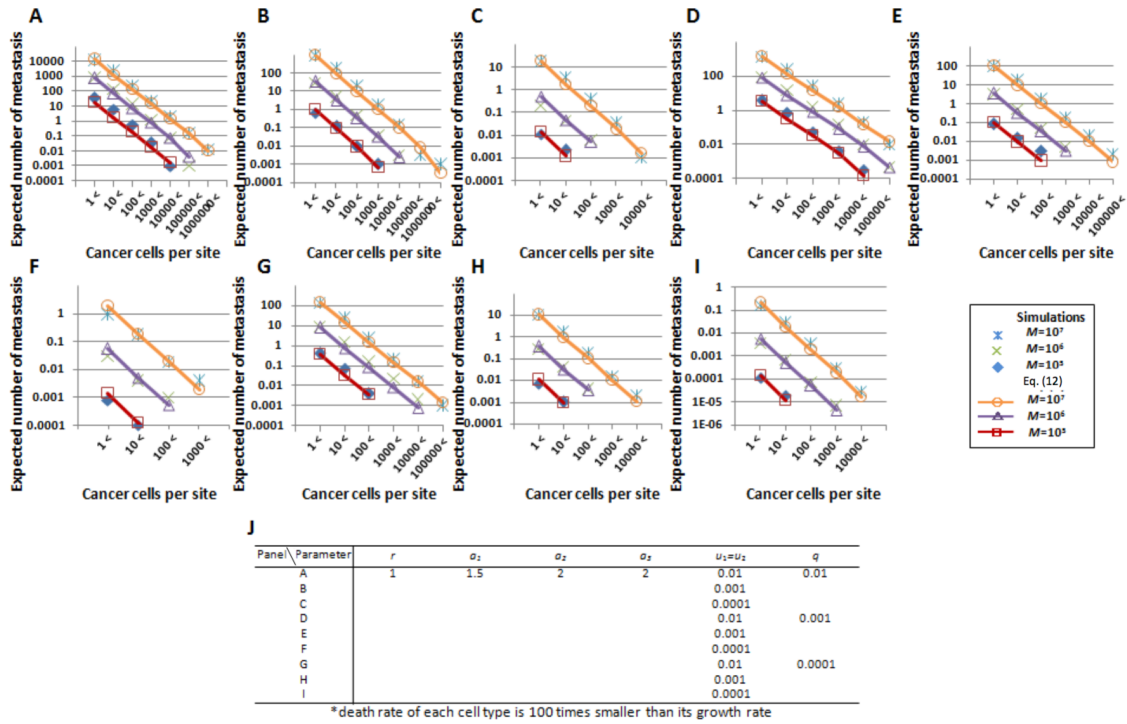

44

45 **Figure S4. Expected number of metastases generated from type-2 cells with**  
 46 **various (epi)genetic alterations and metastatic rates.**

47 The figures show the dependence of the expected number of metastatic sites at  
 48 diagnosis on various parameters. Dots show the results of the direct computer  
 49 simulations, while lines show the predictions of the analytical approximations (Eq. (12)).  
 50 Parameter values used are listed in panel J.

51

Figure S5

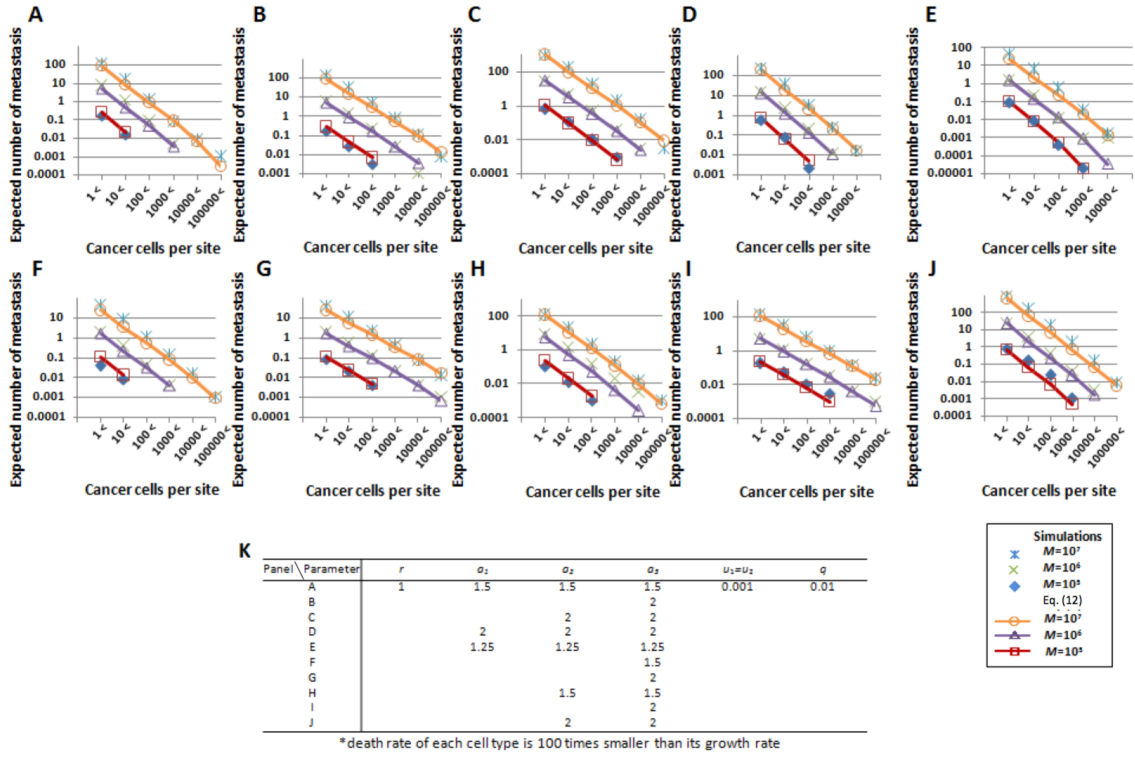

52

53 **Figure S5. Expected number of metastases generated from type-2 cells with**  
 54 **various growth rates for each cell type.**

55 The figures show the dependence of the expected number of metastatic sites  
 56 upon diagnosis on growth rate for each cell type. Dots show the results of the direct  
 57 computer simulations, while lines show the predictions of the analytical approximations  
 58 (Eq. (12)). Parameter values used were listed in panel K.

59

Figure S6

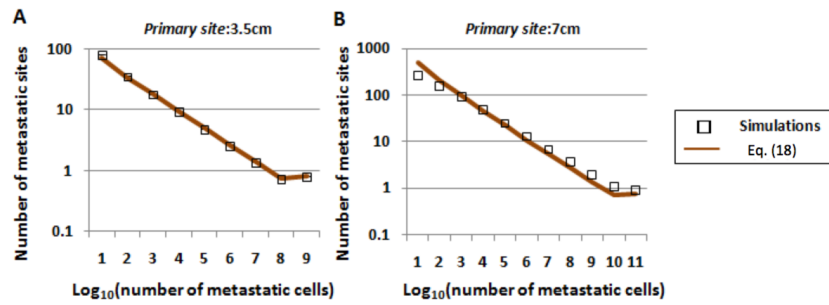

60

61 **Figure S6. Expected number of metastases generated from type-1 and type-2 cells.**

62 The figures show the number of metastatic sites of the indicated sizes upon diagnosis on  
 63 the  $x$ -axis based on computational simulations (black squares) and theoretical formulas  
 64 (brown lines) when the primary tumor is diagnosed at a diameter of (A) 3.5 cm and (B)  
 65 7 cm. Parameter values are  $r=0.11$ ,  $d=0.01r$ ,  $a_1=0.16$ ,  $b_1=0.01a_1$ ,  $a_2=0.24$ ,  $b_2=0.01a_2$ ,  
 66  $a_3=0.58$ ,  $b_3=0.01a_3$ ,  $u_1=u_2=6.31 \times 10^{-5}$ , and  $q=q'=6.31 \times 10^{-7}$ , which are based on the  
 67 estimation using time series clinical data in the pancreatic cancer autopsy program [1].

68

Figure S7

**A Primary site: 1cm**

|                                  | type-1      | type-2      |
|----------------------------------|-------------|-------------|
| 1-10                             | 1.175936764 | 0.034177394 |
| 10 <sup>1</sup> -10 <sup>2</sup> | 0.573806014 | 0.01209167  |
| 10 <sup>2</sup> -10 <sup>3</sup> | 0.318961756 | 0.004930983 |
| 10 <sup>3</sup> -10 <sup>4</sup> | 0.169839703 | 0.001912739 |
| 10 <sup>4</sup> -10 <sup>5</sup> | 0.090031486 | 0.000738073 |
| 10 <sup>5</sup> -10 <sup>6</sup> | 0.047703939 | 0.00028463  |
| 10 <sup>6</sup> -10 <sup>7</sup> | 0.025275195 | 0.000109738 |
| 10 <sup>7</sup> -                | 0.02848195  | 6.86675E-05 |

**B Primary site: 2cm**

|                                  | type-1      | type-2   |
|----------------------------------|-------------|----------|
| 1-10                             | 13.81095788 | 0.913194 |
| 10 <sup>1</sup> -10 <sup>2</sup> | 6.739146982 | 0.323081 |
| 10 <sup>2</sup> -10 <sup>3</sup> | 3.746092067 | 0.131753 |
| 10 <sup>3</sup> -10 <sup>4</sup> | 1.994706742 | 0.051108 |
| 10 <sup>4</sup> -10 <sup>5</sup> | 1.057387687 | 0.019722 |
| 10 <sup>5</sup> -10 <sup>6</sup> | 0.560265746 | 0.007606 |
| 10 <sup>6</sup> -10 <sup>7</sup> | 0.296848151 | 0.002934 |
| 10 <sup>7</sup> -10 <sup>8</sup> | 0.334517372 | 0.001841 |

**C Primary site: 3cm**

|                                  | type-1      | type-2   |
|----------------------------------|-------------|----------|
| 1-10                             | 44.10934641 | 6.053571 |
| 10 <sup>1</sup> -10 <sup>2</sup> | 21.52344329 | 2.141703 |
| 10 <sup>2</sup> -10 <sup>3</sup> | 11.9642442  | 0.873389 |
| 10 <sup>3</sup> -10 <sup>4</sup> | 6.370681267 | 0.338793 |
| 10 <sup>4</sup> -10 <sup>5</sup> | 3.377077836 | 0.130736 |
| 10 <sup>5</sup> -10 <sup>6</sup> | 1.789373054 | 0.050423 |
| 10 <sup>6</sup> -10 <sup>7</sup> | 0.948071671 | 0.019446 |
| 10 <sup>7</sup> -10 <sup>8</sup> | 0.502318869 | 0.0075   |
| 10 <sup>8</sup> -10 <sup>9</sup> | 0.266144576 | 0.002892 |
| 10 <sup>9</sup> -                | 0.407156463 | 0.004008 |

**D Primary site: 4cm**

|                                  | type-1      | type-2   |
|----------------------------------|-------------|----------|
| 1-10                             | 86.76831124 | 22.77998 |
| 10 <sup>1</sup> -10 <sup>2</sup> | 42.33916343 | 8.059366 |
| 10 <sup>2</sup> -10 <sup>3</sup> | 23.53508607 | 3.286618 |
| 10 <sup>3</sup> -10 <sup>4</sup> | 12.53188496 | 1.2749   |
| 10 <sup>4</sup> -10 <sup>5</sup> | 6.643112279 | 0.491967 |
| 10 <sup>5</sup> -10 <sup>6</sup> | 3.519908833 | 0.189744 |
| 10 <sup>6</sup> -10 <sup>7</sup> | 1.864969322 | 0.073178 |
| 10 <sup>7</sup> -10 <sup>8</sup> | 0.988120739 | 0.028222 |
| 10 <sup>8</sup> -10 <sup>9</sup> | 0.523537918 | 0.010884 |
| 10 <sup>9</sup> -                | 0.577246722 | 0.005756 |

**E Primary site: 5cm**

|                                  | type-1      | type-2   |
|----------------------------------|-------------|----------|
| 1-10                             | 132.6275931 | 62.98688 |
| 10 <sup>1</sup> -10 <sup>2</sup> | 64.71649914 | 22.28423 |
| 10 <sup>2</sup> -10 <sup>3</sup> | 35.97398375 | 9.087534 |
| 10 <sup>3</sup> -10 <sup>4</sup> | 19.15530815 | 3.525112 |
| 10 <sup>4</sup> -10 <sup>5</sup> | 10.1541678  | 1.360295 |
| 10 <sup>5</sup> -10 <sup>6</sup> | 5.380271089 | 0.524645 |
| 10 <sup>6</sup> -10 <sup>7</sup> | 2.850653526 | 0.202337 |
| 10 <sup>7</sup> -10 <sup>8</sup> | 1.510367938 | 0.078034 |
| 10 <sup>8</sup> -10 <sup>9</sup> | 0.800241159 | 0.030095 |
| 10 <sup>9</sup> -                | 0.90179028  | 0.018892 |

**F Primary site: 6cm**

|                                  | type-1      | type-2   |
|----------------------------------|-------------|----------|
| 1-10                             | 174.3546853 | 143.476  |
| 10 <sup>1</sup> -10 <sup>2</sup> | 85.07750594 | 50.76061 |
| 10 <sup>2</sup> -10 <sup>3</sup> | 47.29206395 | 20.70023 |
| 10 <sup>3</sup> -10 <sup>4</sup> | 25.18192215 | 8.029752 |
| 10 <sup>4</sup> -10 <sup>5</sup> | 13.34885668 | 3.098576 |
| 10 <sup>5</sup> -10 <sup>6</sup> | 7.073003818 | 1.195073 |
| 10 <sup>6</sup> -10 <sup>7</sup> | 3.747521814 | 0.460897 |
| 10 <sup>7</sup> -10 <sup>8</sup> | 1.985557608 | 0.177751 |
| 10 <sup>8</sup> -10 <sup>9</sup> | 1.052011819 | 0.068552 |
| 10 <sup>9</sup> -                | 1.185510398 | 0.043034 |

69

70 **Figure S7. The number of metastatic sites generated from type-1 and type-2 cells**  
 71 **in different size categories.**

72 The table shows the number of metastatic sites generated by type-1 and type-2  
 73 cells in various size categories. The diameter at diagnosis is (A) 1 cm, (B) 2 cm, (C) 3  
 74 cm, (D) 4 cm, (E) 5 cm, and (F) 6 cm. Parameter values are based on the estimation in  
 75 the autopsy program [1];  $r=0.11$ ,  $d=0.01r$ ,  $a_1=0.16$ ,  $b_1=0.01a_1$ ,  $a_2=0.24$ ,  $b_2=0.01a_2$ ,  
 76  $a_3=0.58$ ,  $b_3=0.01a_3$ ,  $u_1=u_2=6.31 \times 10^{-5}$ , and  $q=q'=6.31 \times 10^{-7}$ .

77

Figure S8

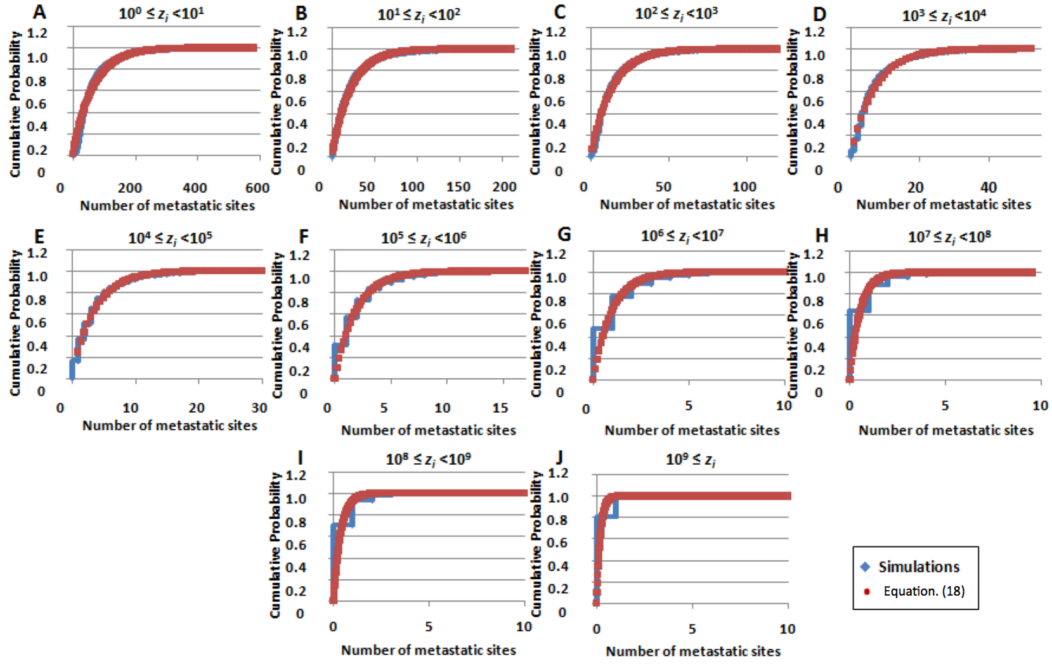

78

79 **Figure S8. Exponential distribution of the number of metastatic sites generated**  
 80 **from both type-1 and type-2 cells in different size categories.**

81 Blue lines denote the results of direct computational simulation, and red lines denote an  
 82 exponential distribution with the mean of the expected numbers of the categories when  
 83 the size of the primary tumor is 1 cm. Parameters are based on the estimation in the  
 84 autopsy program [1].;  $r=0.11$ ,  $d=0.01r$ ,  $a_1=0.16$ ,  $b_1=0.01a_1$ ,  $a_2=0.24$ ,  $b_2=0.01a_2$ ,  $a_3=0.58$ ,  
 85  $b_3=0.01a_3$ ,  $u_1=u_2=6.31 \times 10^{-5}$ ,  $q=q'=6.31 \times 10^{-7}$ , and  $M=2.7 \times 10^9$ .

86

87

Figure S9

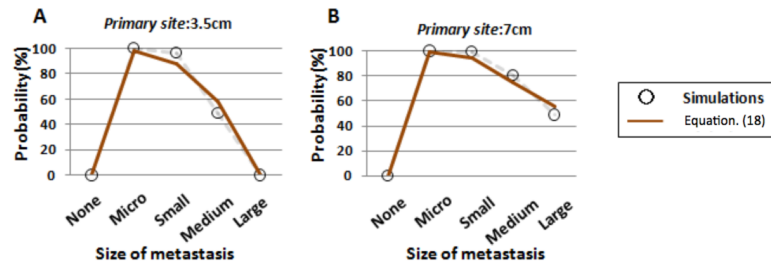

88

89 **Figure S9. Probability of metastasis generated from both type-1 and type-2 cells in**  
 90 **different size categories.**

91 Panels show the probabilities of existence of metastases of the indicated sizes upon  
 92 diagnosis on the  $x$ -axis, with the assumption that the number of metastatic sites follows  
 93 an exponential distribution with the mean of the expected numbers of categories. “Large”  
 94 denotes a metastatic site larger than 2.5 cm, “medium” denotes between 0.5 cm and 2.5  
 95 cm, “small” denotes between 0.1 cm and 0.5 cm, and “micro” denotes less than 0.1 cm.  
 96 The diameter of the primary tumor at diagnosis is (A) 3.5 cm and (B) 7 cm. Parameter  
 97 values are based on the estimation in the autopsy program [1].;  $r=0.11$ ,  $d=0.01r$ ,  
 98  $a_1=0.16$ ,  $b_1=0.01a_1$ ,  $a_2=0.24$ ,  $b_2=0.01a_2$ ,  $a_3=0.58$ ,  $b_3=0.01a_3$ ,  $u_1=u_2=6.31\times 10^{-5}$ , and  
 99  $q=q'=6.31\times 10^{-7}$ .

100

101

Figure S10

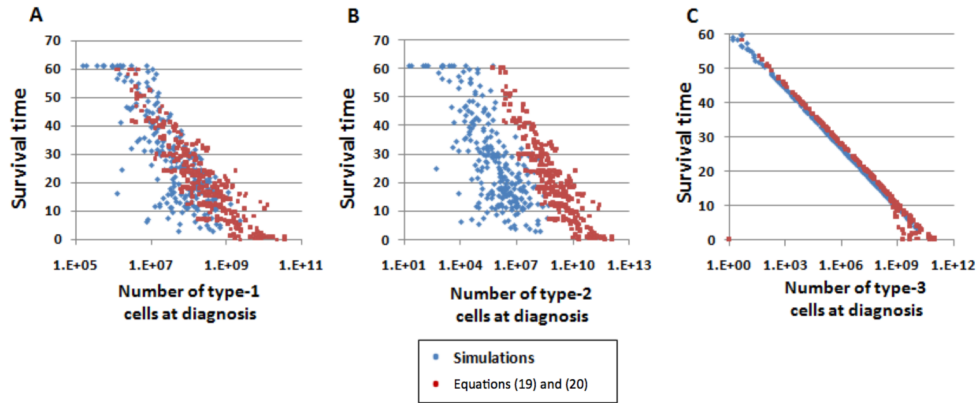

102

103 **Figure S10. Relationship between the number of cells in each population at**  
 104 **diagnosis and survival duration.**

105 Red dots show the theoretical predictions by Eqs. (19) and (20), and blue dots show  
 106 the results of computational simulations. Population types are (A) type-1, (B) type-2,  
 107 and (C) type-3. Parameter values are based on the estimation in the autopsy program  
 108 [1].;  $r=0.11$ ,  $d=0.01r$ ,  $a_1=0.16$ ,  $b_1=0.01a_1$ ,  $a_2=0.24$ ,  $b_2=0.01a_2$ ,  $a_3=0.58$ ,  $b_3=0.01a_3$ ,  
 109  $u_1=u_2=6.31 \times 10^{-5}$ ,  $q=q'=6.31 \times 10^{-7}$ ,  $M=10^{N(9.47,0.59)}$ , and  $M'=10^{11.2}$ . Here,  $N(9.47, 0.59)$   
 110 represents the normal distribution with mean 9.47 and variance 0.59.

111

Figure S11

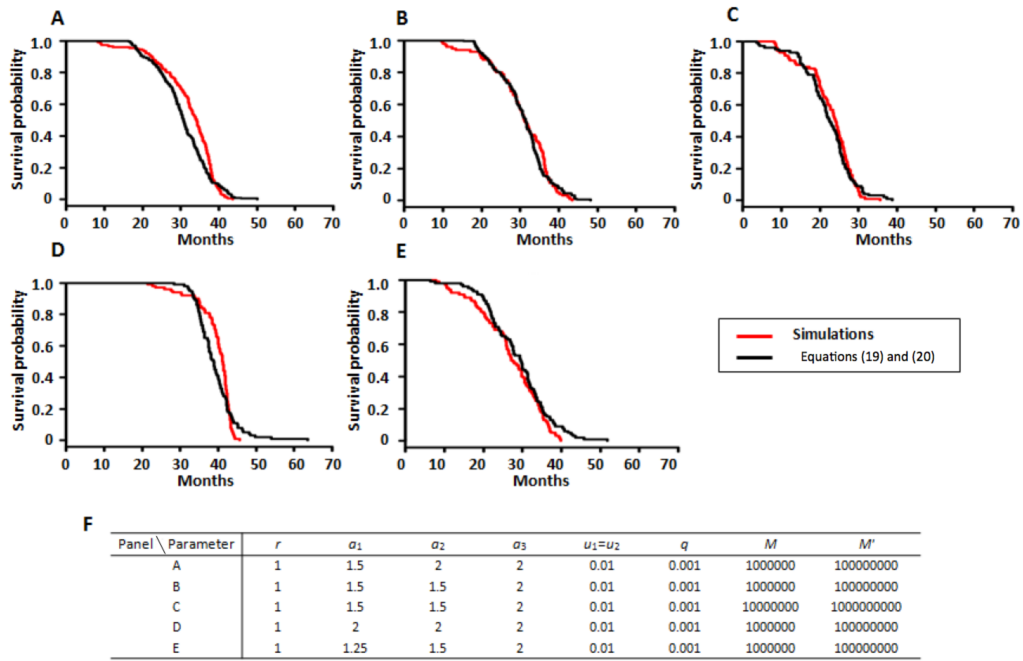

112

113 **Figure S11. Survival based on computational simulations and theoretical**  
 114 **predictions.**

115 Survival analyses comparing theoretical predictions (black lines, Eq. (19) and  
 116 (20)) and computational simulations (red lines).  $P$  values are (A) 0.10, (B) 0.92, and (c)  
 117 0.86, (D) 0.77, and (E) 0.10. Parameter values used are listed in panel F.

118



119

## REFERENCES

- 120 1. Haeno H, Gonen M, Davis MB, Herman JM, Iacobuzio-Donahue CA, Michor F.  
121 Computational modeling of pancreatic cancer reveals kinetics of metastasis suggesting  
122 optimum treatment strategies. *Cell* 2012;148: 362-375.
